# Supplementary material
Source: PubMed Central journal article supplement (PMC3793633)
Supplement: NIHMS478870-supplement-1.pdf [file NIHMS478870-supplement-1.pdf]

## **Supplement information**

### **Hypoxia induces netrin-1 and Unc5b in atherosclerotic plaques: a mechanism for macrophage retention and survival**

Bhama Ramkhelawon, Yuan Yang, Janine M van Gils, Bernd Hewing, Katey J Rayner, Sajesh Parathath, Liang Guo, Scott Oldebeken, Jessica L Feig, Edward A Fisher & Kathryn J Moore.

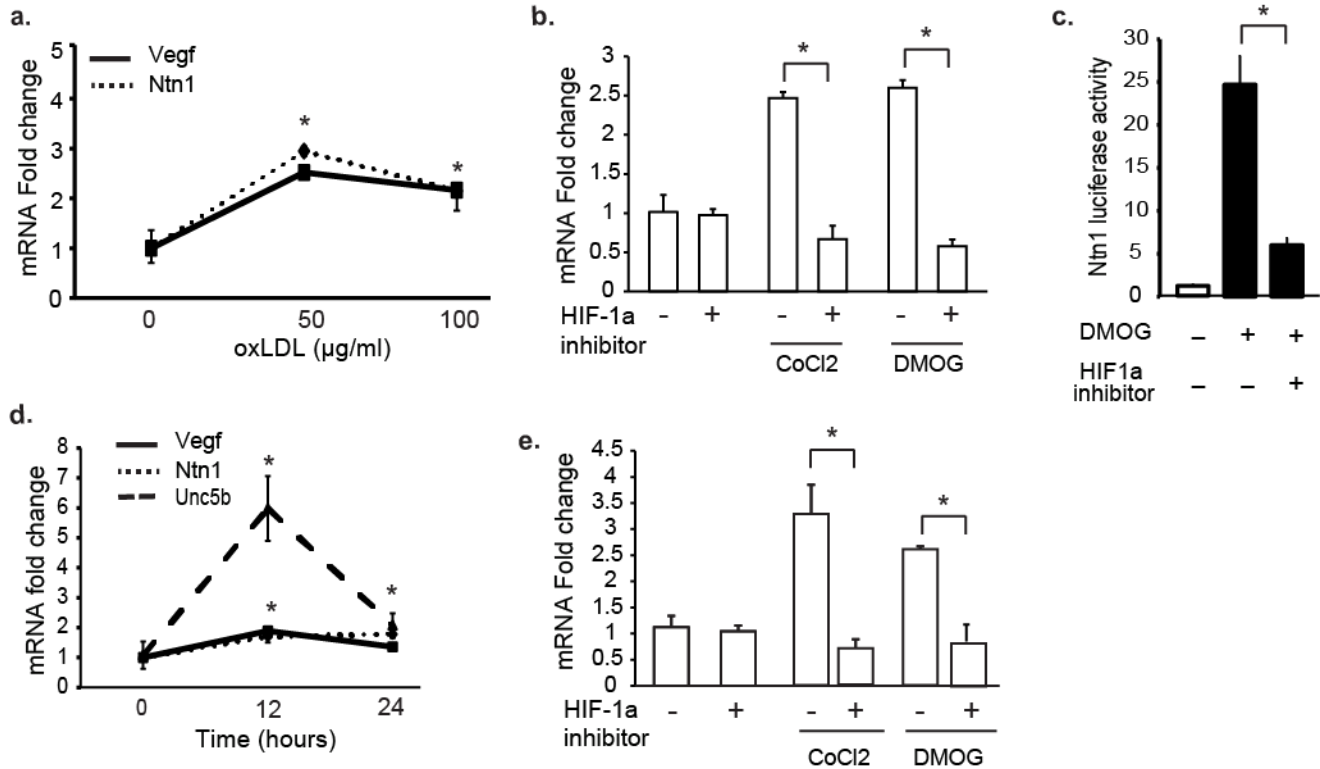

**Supplemental Figure I.** (a) qPCR analysis of *Ntn1* and *Vegf* mRNA in BMDMs treated with oxLDL for 24 hours. (b) qPCR analysis of *Ntn1* mRNA in BMDMs treated with DMOG (1 mmol/L) or CoCl<sub>2</sub> (0.1 mmol/L) with or without HIF-1α inhibitor (100 µmol/L). (c) Netrin-1 promoter-luciferase reporter activity in HEK293 cells treated with DMOG (1 mmol/L) in the presence/absence of the HIF-1α inhibitor (100 µmol/L). (d) qPCR analysis of *Vegf*, *Ntn1* and *Unc5b* mRNA in peritoneal macrophages stimulated with 50 µg/ml oxLDL for the indicated times. (e) qPCR analysis of *Unc5b* mRNA expression in BMDMs stimulated with DMOG (1 mmol/L) and CoCl<sub>2</sub> (0.1 mmol/L) with or without HIF-1α inhibitor (100 µmol/L). Data are mean ± s.d. of triplicate samples in a single experiment and are representative of 3-4 independent experiments. \*P<0.05.
